# Supplementary material for: Introgression facilitates rapid evolution of Galápagos tree finches
Source: Research Square preprint supplement (doi:10.21203/rs.3.rs-8220844/v1), 2026-01-21
Supplement: Supplementary file 1 [file efc99c0d29a15fe04deddfb7.pdf]

## Supplementary Material

**Title:** Introgression facilitates rapid evolution of Galápagos tree finches

Matteo Sebastianelli Arbelaez<sup>1,2</sup>, Erik D. Enbody<sup>3</sup>, Carl-Johan Rubin<sup>1,2</sup>, Carlos Valle<sup>4</sup>, Lukas F. Keller<sup>5</sup>, B. Rosemary Grant<sup>6</sup>, Peter R. Grant<sup>6</sup>, Leif Andersson<sup>1,2,7</sup>

<sup>1</sup>Department of Medical Biochemistry and Microbiology, Uppsala University, Uppsala, Sweden.

<sup>2</sup>SciLifeLab, Uppsala University, Uppsala, Sweden

<sup>3</sup>Department of Computational Biology, Cornell University, NY, USA.

<sup>4</sup>Colegio de Ciencias Biológicas y Ambientales, Galápagos Science Center GSC, Universidad San Francisco de Quito USFQ, Quito, Ecuador.

<sup>5</sup>Department of Evolutionary Biology and Environmental Studies, University of Zürich, Zürich, Switzerland

<sup>6</sup>Department of Ecology and Evolutionary Biology, Princeton University, Princeton, NJ, USA.

<sup>7</sup>Department of Veterinary Integrative Biosciences, Texas A&M University, College Station, TX, USA.

### **Supplementary Notes 1**

#### *Test for introgression within the *C. pallidus*/*C. heliobates* group*

We compared western *pallidus*, *pallidus* S. Cruz and *C. heliobates* genome-wide, using the two *Loxigilla* species as outgroup. Central *pallidus* groups with the western subspecies in the most abundant tree topology genome-wide (Fig. S4, BBAA), followed by an ABBA tree that reflects gene flow between *C. heliobates* and western *pallidus* (Table 1a). Gene flow with the latter is the likely cause for the preponderance of ABBA over BABA trees, which is otherwise unlikely to arise because of incomplete lineage sorting, which would result in comparable occurrences of ABBA and BABA trees.

### **Supplementary Notes 2**

#### *Genomic landscape of absolute divergence*

We explored genome-wide patterns on genomic differentiation by estimating *dxy* in 10 kb non-overlapping windows for all *Camarhynchus* taxa. We observed regions of relatively high *dxy*, including one on chromosome 1A when comparing large tree finches with small tree finches (Fig. S6), highlighting the *G03* locus segregating for ancestral haplotypes with major effects on beak and body size<sup>1,2</sup> (Supplementary Notes). The other *dxy* divergence peaks on other chromosomes are shared in all the comparisons among taxa (also highlighting ancestral variation), but are not present in any *Fst* contrast. For instance, a *dxy* divergence peak on chromosome 11 spanning a 380 Kb region on chromosome 11 points towards a polymorphism that is shared in all *Camarhynchus* populations. Interestingly, based on our dataset, haplotypes within this region are either homozygous to *C. parvulus* or heterozygous, but never homozygous for the alternative allele (Fig. S7a). Furthermore, this pattern is shared with the *Loxigilla* outgroups as well, suggesting this polymorphism is old. Indeed, by leveraging our entire genomic dataset consisting of 415 individual Darwin's finches (including the 77 considered in the current study), we confirm this polymorphic region is shared by all Darwin's finch lineages (Fig. S7a), and likely most of the members of the Thraupidae family. By calculating nucleotide diversity in a central *psittacula* individual (106Saz3, heterozygous at the 380 Kb region), we observed a sudden increase of nucleotide diversity to > 3% within this region, compared to a genome-wide background of 0.1% (Fig. S7b). However, a more in-depth investigation revealed this to be a sex-dependent pattern, with all individuals classified as heterozygous based on this region being females. By normalizing the sequencing depth to the median per site across this region, we reveal that a copy number variation is present in female individuals (Fig. S7c), but not in males (Fig. S7d), and likely involves a translocation of a copy of this~ 380 Kb region of chromosome 11 on the W chromosome, given that females are the heterogametic sex in birds. Our results imply that the translocation happened during the evolution of tanagers well before the evolution of Darwin's finches.

### Supplementary Notes 3

#### Gene content at divergence peaks

By focusing on regions of elevated *Fst*, we identified four major divergent regions differentiating tree finch populations: these are located on chromosomes 1A, 5, 6 and Z. The divergence island on chromosome 1A hits a key locus for Darwin's finch evolution (*i.e.* *G03*), known to mediate ecological adaptation of Darwin's finches by affecting beak size<sup>3</sup>. Specifically, the divergence peak revealed by this study maps on a ~500 kb core region that includes four genes: the *WNT inhibitory factor 1* (*WIF1*), the *LEM domain-containing protein 3* (*LEMD3*), the *methionine sulfoxide reductase B3* (*MSRB3*) and the *high mobility AT-hook 2* (*HMG42*). The latter gene is a chromatin-associated protein that can affect the transcription factor activity<sup>4</sup> and has been associated with dwarfism in mice<sup>5</sup> and human height<sup>6,7</sup>. The presence of this locus therefore explains the occurrence of the divergence peak in every contrast involving subspecies with known difference in beak size (Fig. 5 and S8). Even though sample size was too small to perform and *Fst* contrasts among *C. pallidus* subspecies and *C. heliobates*, haplotypes at this locus (Fig. 5, bottom panel) suggest that these two species also share haplotypes similar to the large tree finch *C. psittacula*. In fact, both *C. pallidus* and *C. heliobates* (to a lesser extent) overlap with *C. psittacula* in beak size (*i.e.* PC1), but not beak shape (*i.e.* PC2, Fig. 1c).

Chromosome 5 harbours another divergence peak when comparing northern *psittacula* with each of the other closely related tree finches (western *psittacula*, *C. pauper* and *C. parvulus*), a region spanning approximately 600 Kb that encloses 13 genes (Fig. S9; Table S3). However, most fixed differences between northern *psittacula* and the other finches accumulate around the *INO80 complex ATPase subunit (INO80)*, a gene that plays a pivotal role in chromatin remodelling<sup>8</sup>, smooth muscle differentiation<sup>9</sup> but that is also involved in the response to DNA replication stress due to heat exposure by affecting nucleosome mobility<sup>10</sup>.

A 80 Kb region on chromosome 6 that includes six genes (Table S3, Fig. S10) distinguishes the medium tree finch *C. pauper* from northern *psittacula* and, to some extent, western *psittacula*, specifically in correspondence of *ATP binding cassette subfamily G2 (ABCG2)*, *biogenesis of lysosomal organelles complex 1 subunit 2 (BLOC1S2)* and *cytochrome P450 family 2 subfamily C member 23 (CYP2C23)*, whereas a narrower divergent region between western and northern *psittacula* includes the *arachidonate 5-lipoxygenase (ALOX5)*. Strikingly, most of the above mentioned genes (*i.e.* *ALOX5* and *CYP2C23* together with *SCD* and *PDK2L1*) are all highly expressed in the liver and play a crucial role in fatty acid metabolism<sup>11–13</sup>, whereas *ABCG2* is known to affect egg shell coloration<sup>14</sup>, with the *stearoyl-CoA desaturase (SDC)*, *polycystin 2 like 1*, *transient receptor potential cation channel (PDK2L1)* and *BLOC1S2* being also involved in egg production<sup>15</sup>. However, in his book Lack describes Darwin's finch eggs to “look much alike, being white with small pinkish spots”, even though they differ in size to some extent<sup>16</sup>.

The divergence landscape is different on chromosome Z, with chromosome-wide elevated delta allele frequency in most comparisons (Fig. S11). However, by using the contrast between the

least divergent tree finches western *psittacula* and *C. parvulus*, we narrowed down the number of divergent regions to four, based on variant sites with delta allele frequency > 0.8 (Fig. S11, dashed line). The first divergence peak on chromosome Z spans approximately 86 Kb and includes the *lysyl-oxidase (LOX)* and the *serum response factor binding protein 1 (SREBP1)*, with the SNP with the highest delta allele frequency between western *psittacula* and *C. parvulus* located between the two genes. *LOX* is known to affect multiple processes, including bone matrix formation and osteogenic differentiation<sup>17</sup>, whereas *SREBP1* is involved in regulation of concentration of cellular NAD/NADH<sup>18</sup>. A second ~430 Kb region includes two genes: the *ADAM metalloproteinase with thrombospondin type 1 motif 19 (ADAMTS19)*, known to play a key role in several cellular processes but also during development and ovulation<sup>19</sup>, and *chondroitin sulfate synthase 3 CHSY3*, highly expressed in cartilages<sup>20</sup> and essential for bone and joint development<sup>21</sup>. A 60 Kb region at approximately 37 Mb has a predominance of genes involved in egg production and embryonic maturation (*i.e. TUT7, GOLM1, NTRK2*) in birds and mammals<sup>22-24</sup> as well as egg shell color (*i.e. ISCA1 and AGTPBP1*)<sup>25</sup>. Finally, the most divergent peak between western *psittacula* and *C. parvulus* (with SNPs completely fixed between the two) maps into a 120 Kb region at 57 Mb that includes only one gene: the *follistatin (FST)*, a gene widely known for its pleiotropic effects affecting several important biological functions in birds such growth rates<sup>26</sup> and fertility in chicken<sup>27</sup> as well as head pigmentation in Gouldian finches<sup>28,29</sup>. It is worth noting that the sites that reach complete fixation between western *psittacula* and *C. parvulus* are located upstream *FST*, suggesting their involvement in the regulation of its expression.



## Figures

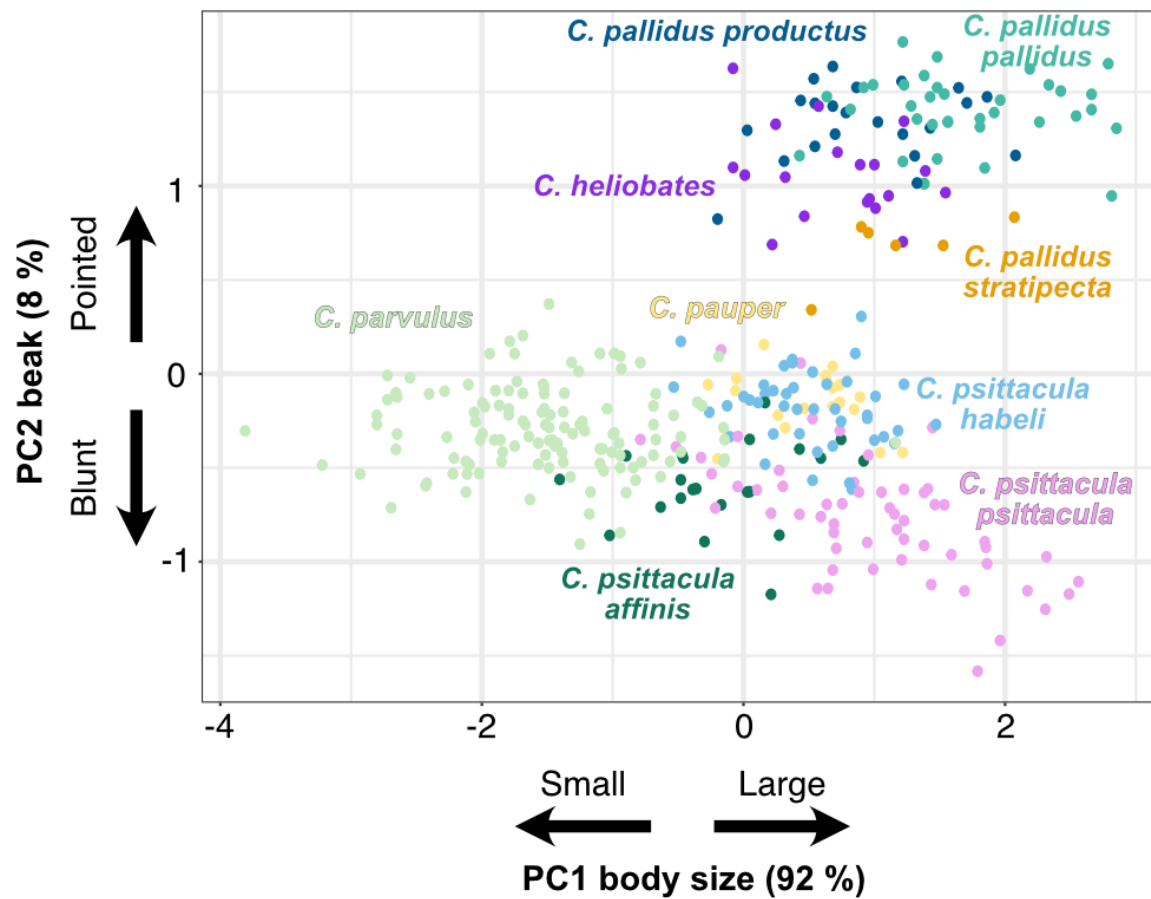

**Fig. S1: Morphological variation in beak and body size across *Camarhynchus* taxa.** PCA plot based on measurements from 348 museum specimens reflecting morphological variation in body size (x-axis) based on wing and tarsus length and beak shape (y-axis) based on beak length, depth, and width.

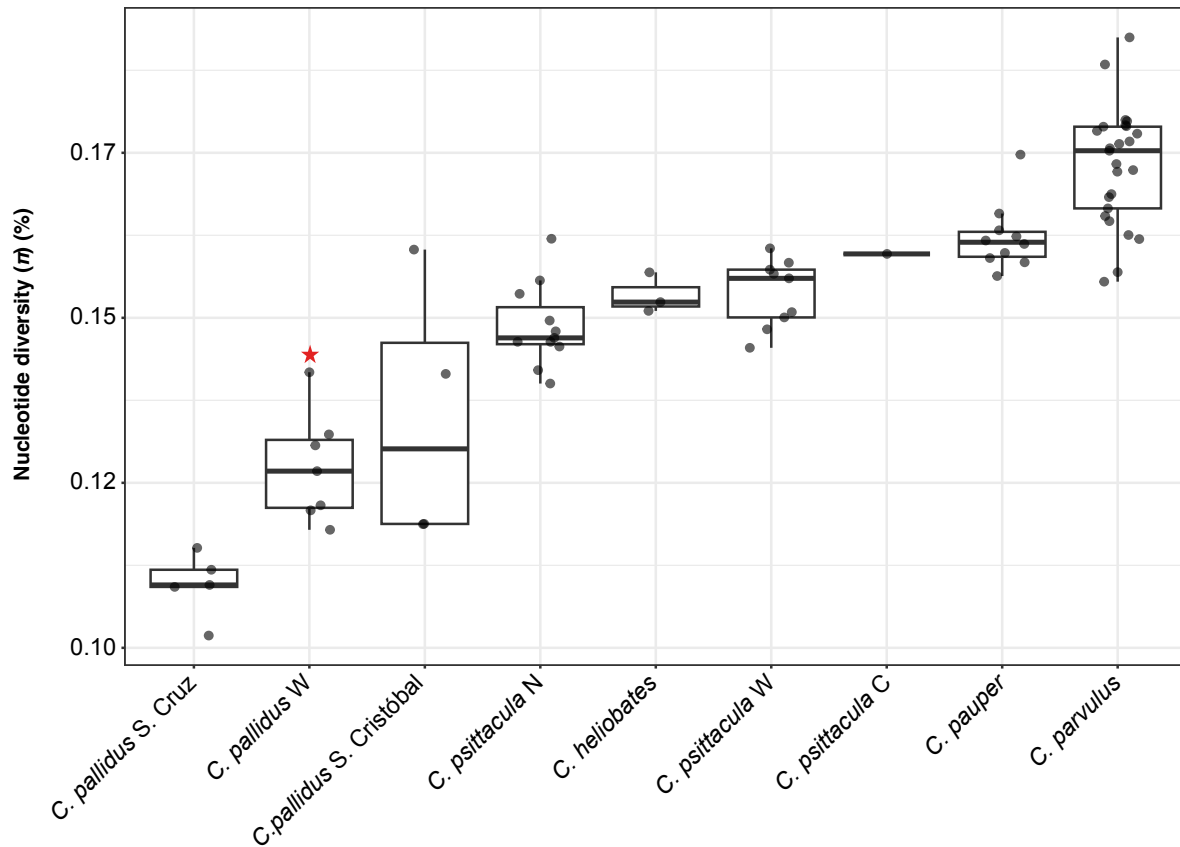

**Fig. S2: Individual nucleotide diversity ( $\pi$ ) of the critically endangered tree finches.** Individual nucleotide diversity for all *Camarhynchus* individuals analysed in this study. The red star marks a putative hybrid *C. pallidus* x *C. heliobates* (102Isa1940) originally classified as *C. pallidus*, an individual with the highest nucleotide diversity of all the other *C. p. productus*. The figure also illustrates that all *C. pauper* have higher nucleotide diversity than individuals from islands of comparable size (e.g. the northern *psittacula* from Pinta and Marchena) and, interestingly, similar to the western *psittacula*, known to hybridize with *C. parvulus*.

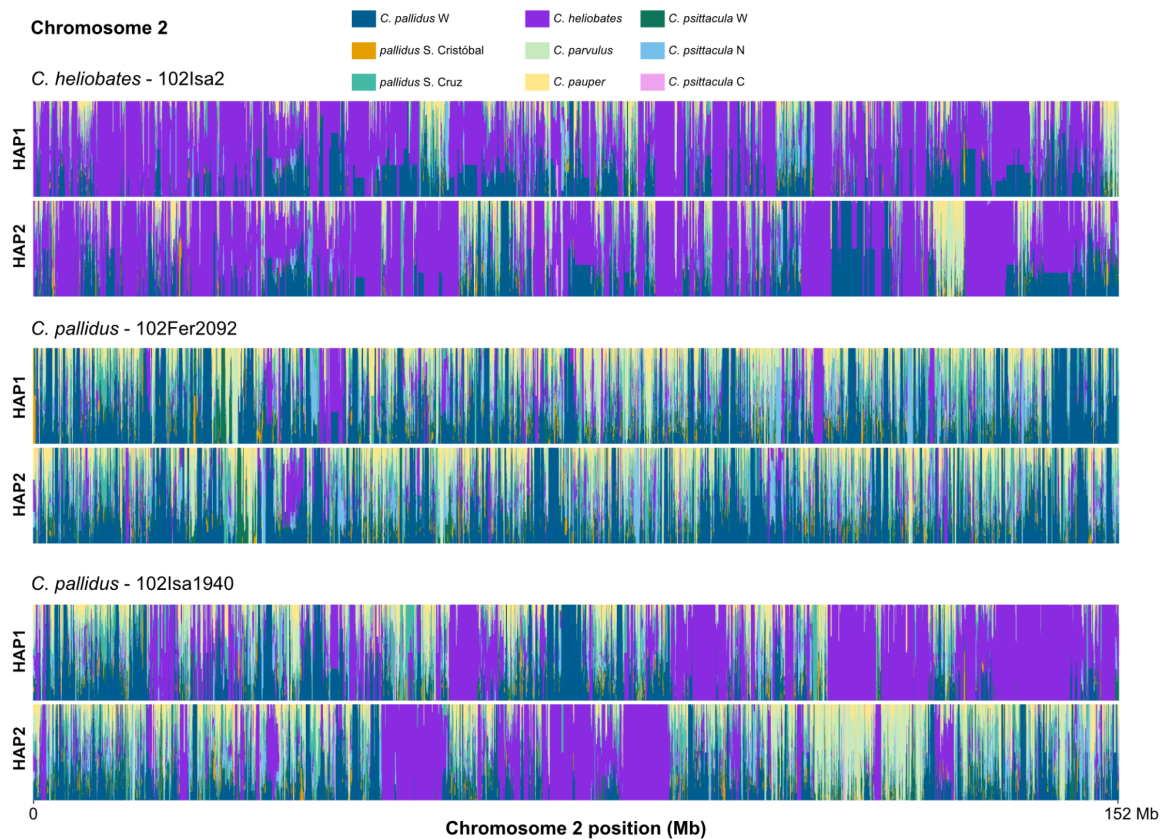

**Fig. S3: Chromosome-level GNN haplotype plot.** Example of a GNN haplotype plot for chromosome 2, the largest chromosome in the Darwin's finch genome, between a *C. heliobates* individual (top panel, 102Isa2), a *C. pallidus productus* from Fernandina island (middle panel, 102Fer2092) and the putative *C. pallidus productus* x *C. heliobates* hybrid (bottom panel, 102Isa1940), the latter showing mixed ancestry tracks.

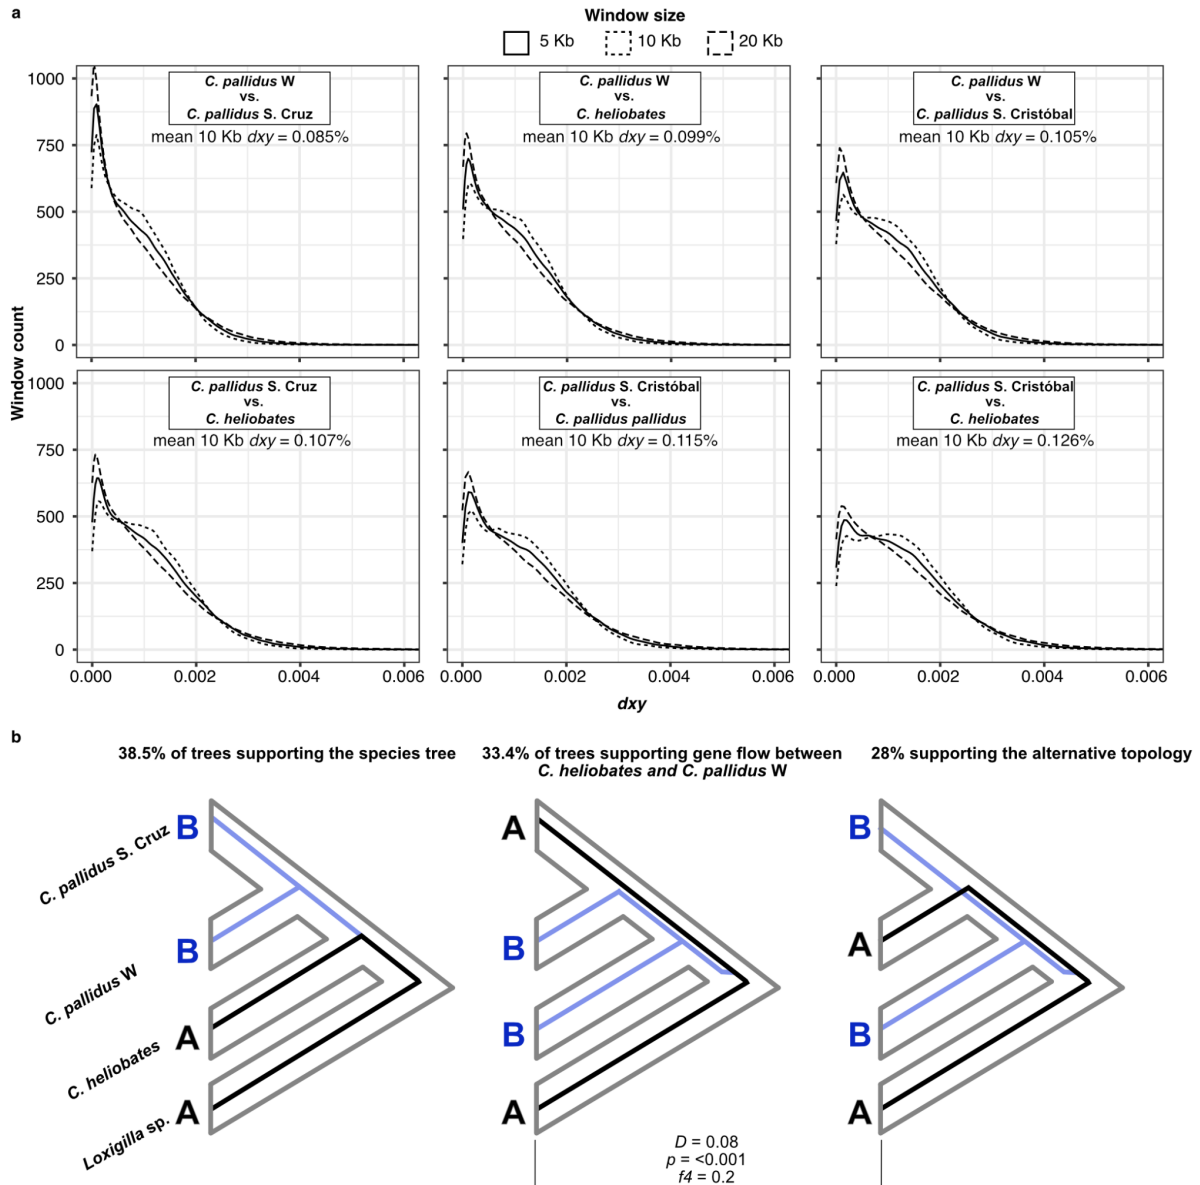

**Fig. S4: Patterns of absolute diversity and introgression in the *Camarhynchus pallidus*/*C. heliobates* group. a) *dxy* distributions among *Camarhynchus pallidus*/*C. heliobates* populations. Panels are sorted left to right and top to bottom to reflect decreasing *dxy* mean values based on 10 Kb windows. b) Results for ABBA-BABA test for introgression among *C. pallidus* S. Cruz, western *pallidus* and *C. heliobates*, with panels sorted left to right according to the most common tree topology. *Loxigilla noctis* and *L. barbadensis* are used as outgroups.**

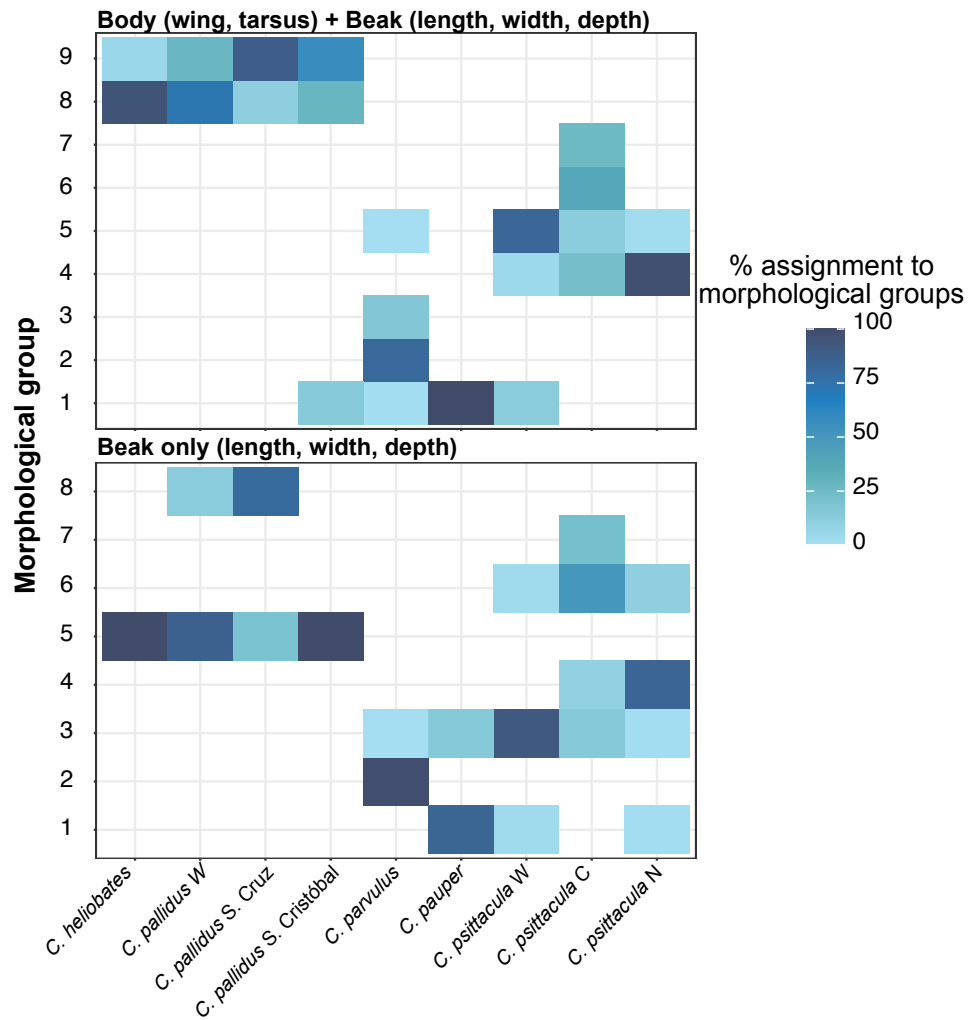

**Fig. S5: Morphological space in *Camarhynchus*.** Percentage of assignment of each *Camarhynchus* subspecies to the morphological groups inferred with normal mixture models (NMMs). In the upper panel, morphological groups are inferred using a combination of five morphological measurements comprising body measurements, whereas in the bottom panel, morphological groups are based on the beak measurements only.

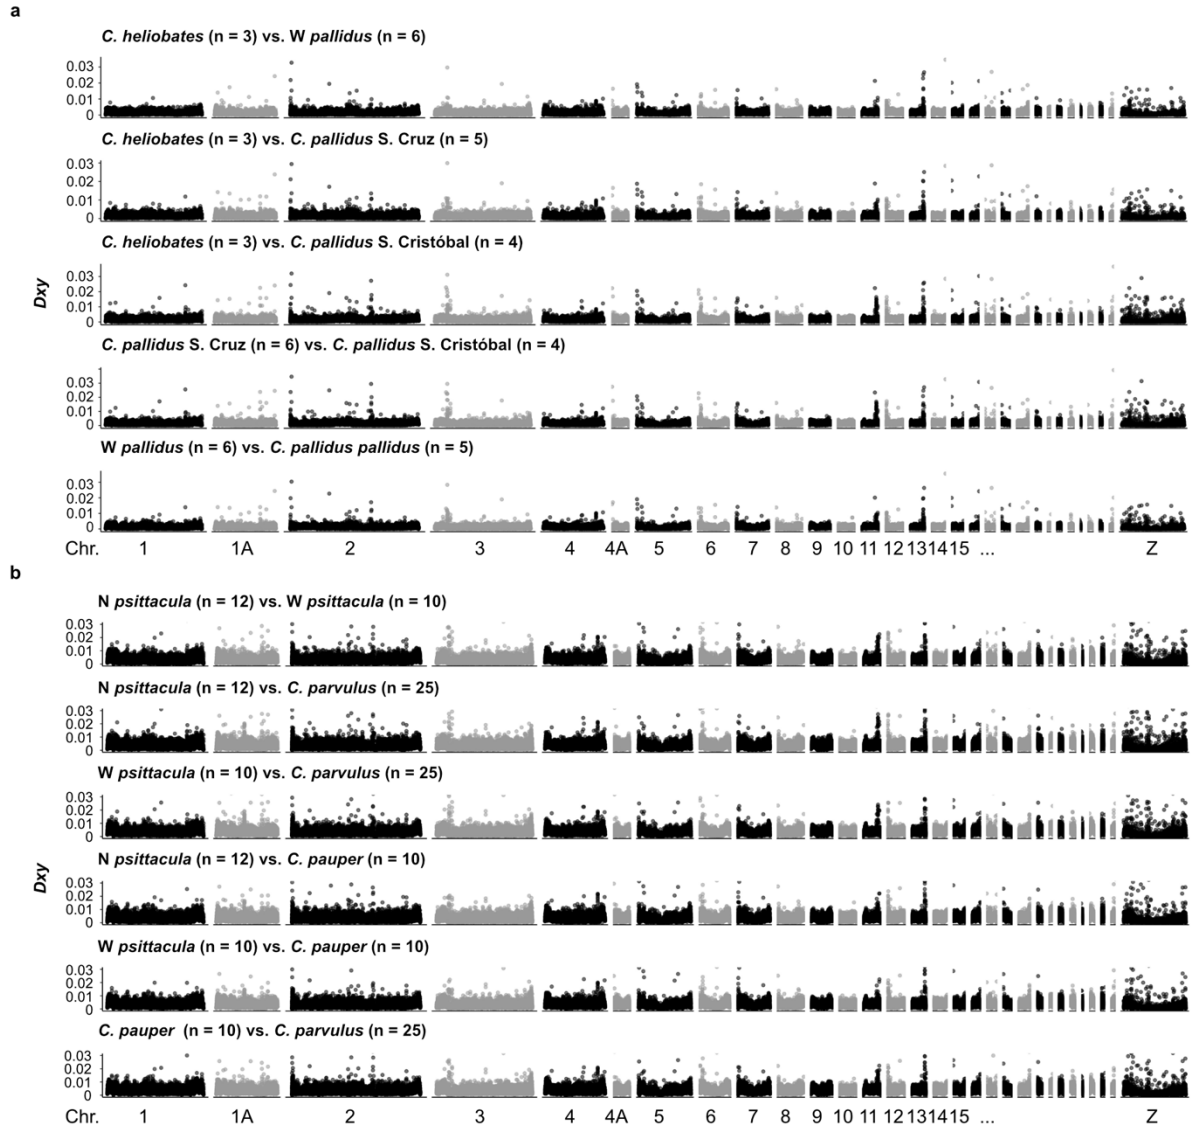

**Fig. S6: Genomic landscape of absolute divergence.** Genome-wide *dxy* calculated in 10 Kb non-overlapping windows among a) *C. heliobates* and *C. pallidus* as well as b) among *C. parvulus*, *C. pauper* and *C. psittacula* subspecies.

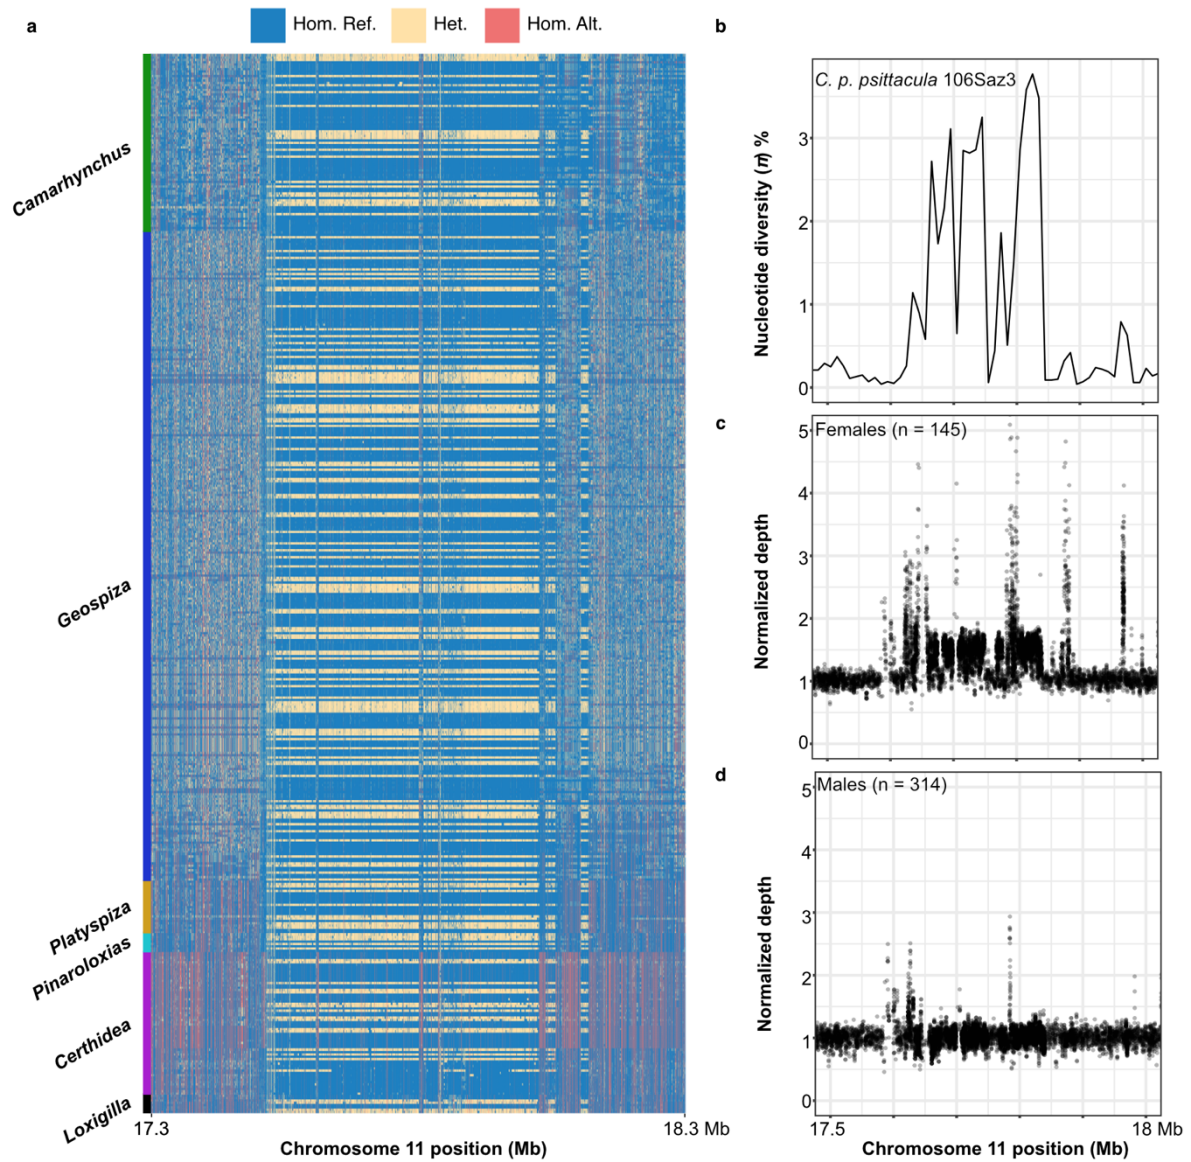

**Fig. S7: Haplotypes, nucleotide diversity and copy number variation patterns on Darwin's finch chromosome 11.** Individual haplotypes across the ~380 Kb region on chromosome 11. Haplotypes of 415 Darwin's finch and outgroup individuals are shown in **a**), sorted according to phylogenetic order, with the *Camarhynchus* genus (the most recent) placed at the top. **b**) shows nucleotide diversity ( $\pi$ ) for a female central *psittacula* (106Saz3), whereas median normalized sequencing depth across this region for 145 females and 314 males is shown in **c**) and **d**), respectively.

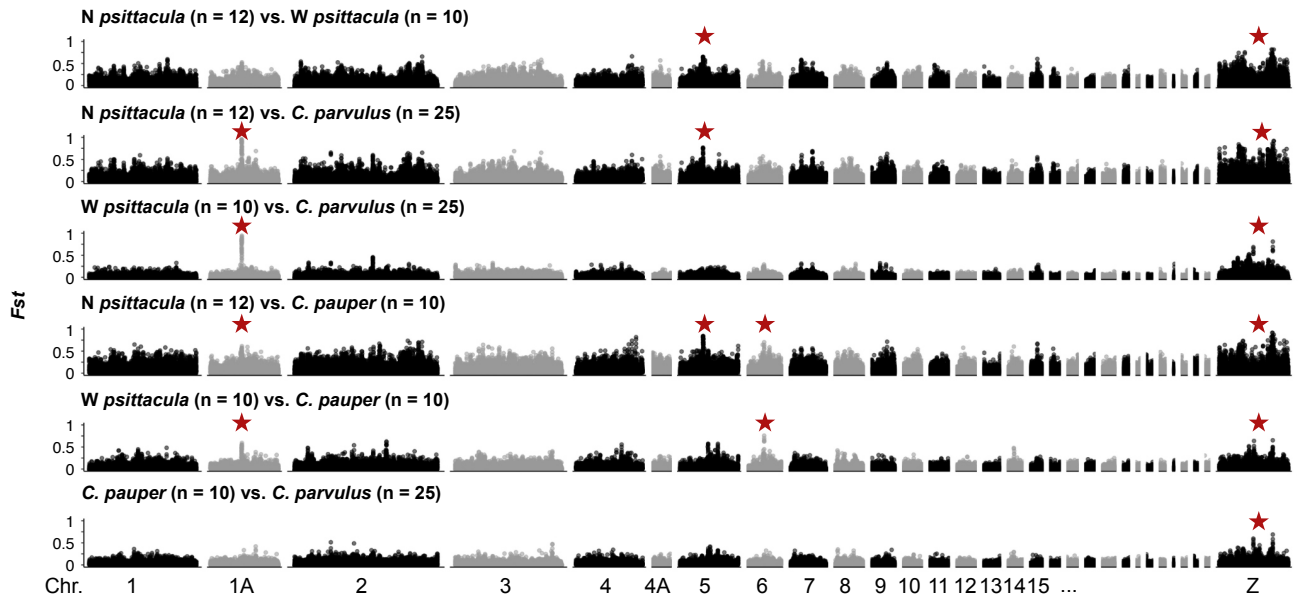

**Fig. S8: Genomic landscape of relative divergence.**  $F_{st}$  calculated in 10 kb windows among large (*C. psittacula*), medium (*C. pauper*) and small (*C. parvulus*) tree finch taxa.



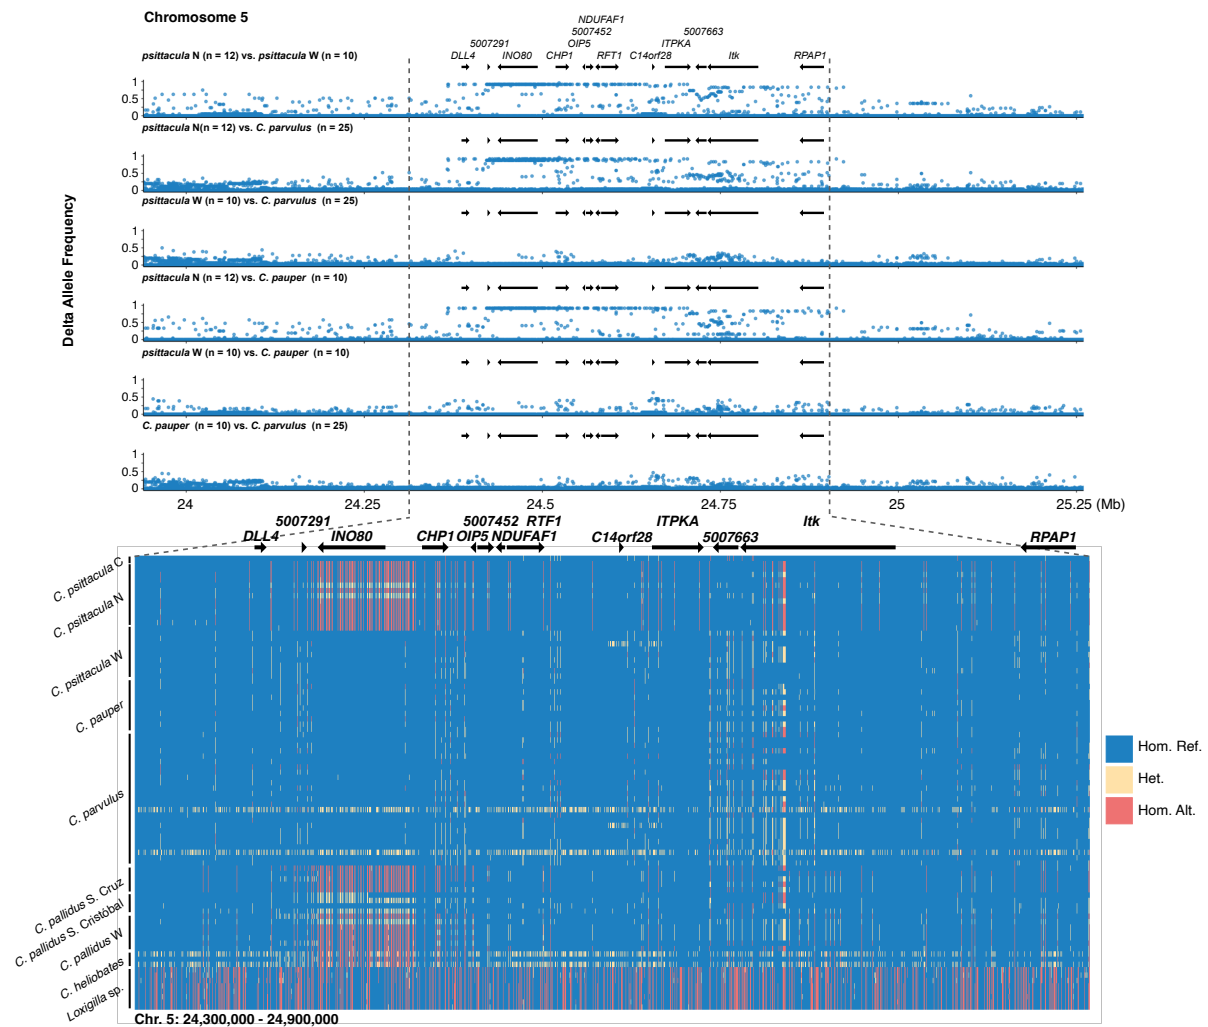

**Fig. S9: Close-up of chromosome 5 divergence peak.** Delta allele frequency plot among *C. psittacula*, *C. pauper* and *C. parvulus* (upper panel) as well as individual haplotypes across a 600 Kb region harbouring most allele frequency differences (bottom panel). The latter includes all the taxa used in this study, including the outgroups. The blue color in the lower panel indicates homozygosity to *C. parvulus*.

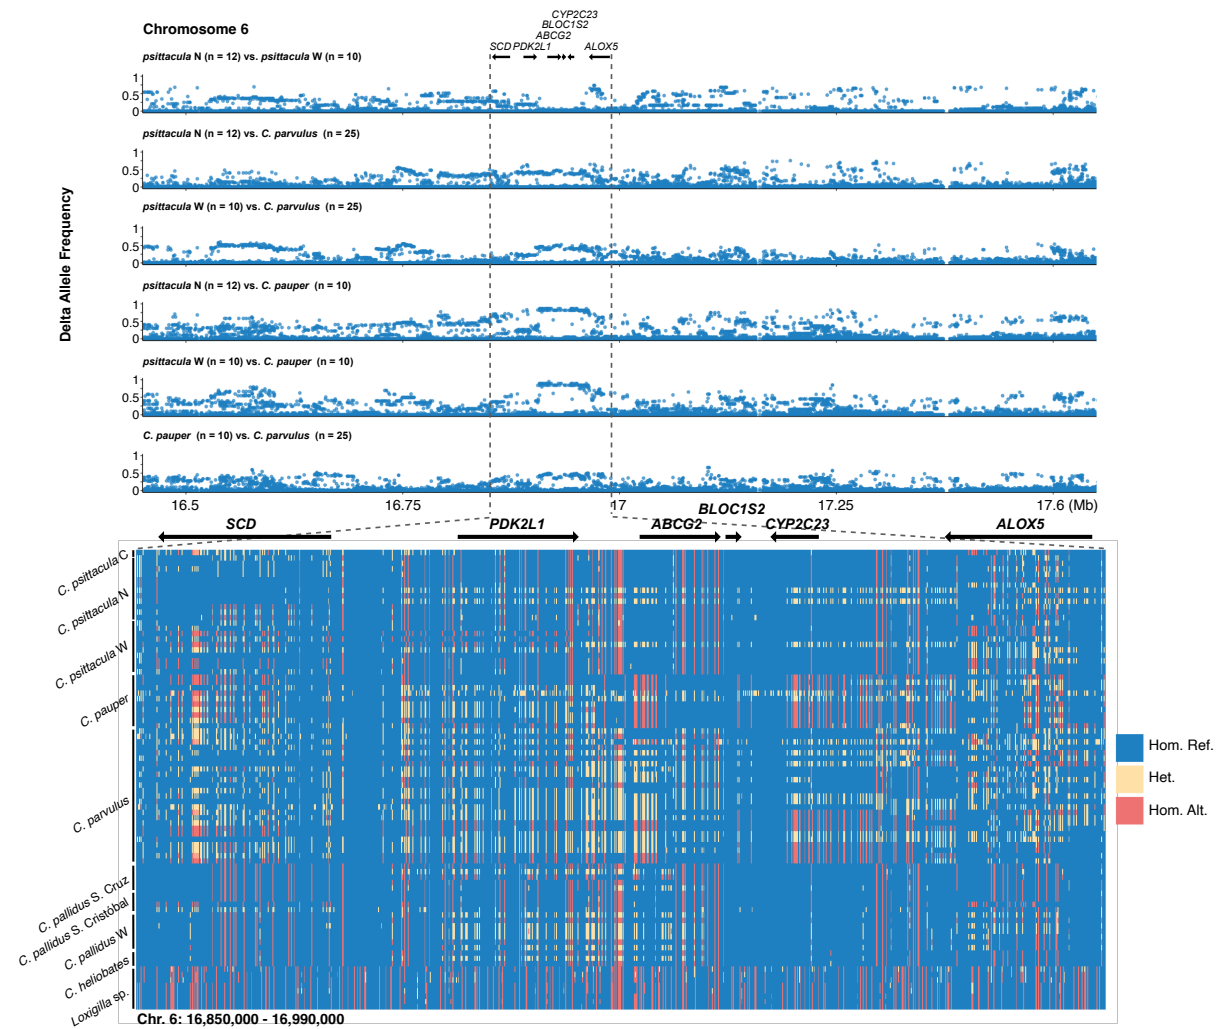

**Fig. S10: Close-up of chromosome 5 divergence peak.** Delta allele frequency plot among *C. psittacula*, *C. pauper* and *C. parvulus* (upper panel) as well as individual haplotypes across a 600 Kb region harbouring most allele frequency differences (bottom panel). The latter includes all the taxa used in this study, including the outgroups. The blue color in the lower panel indicates homozygosity to *C. parvulus*.

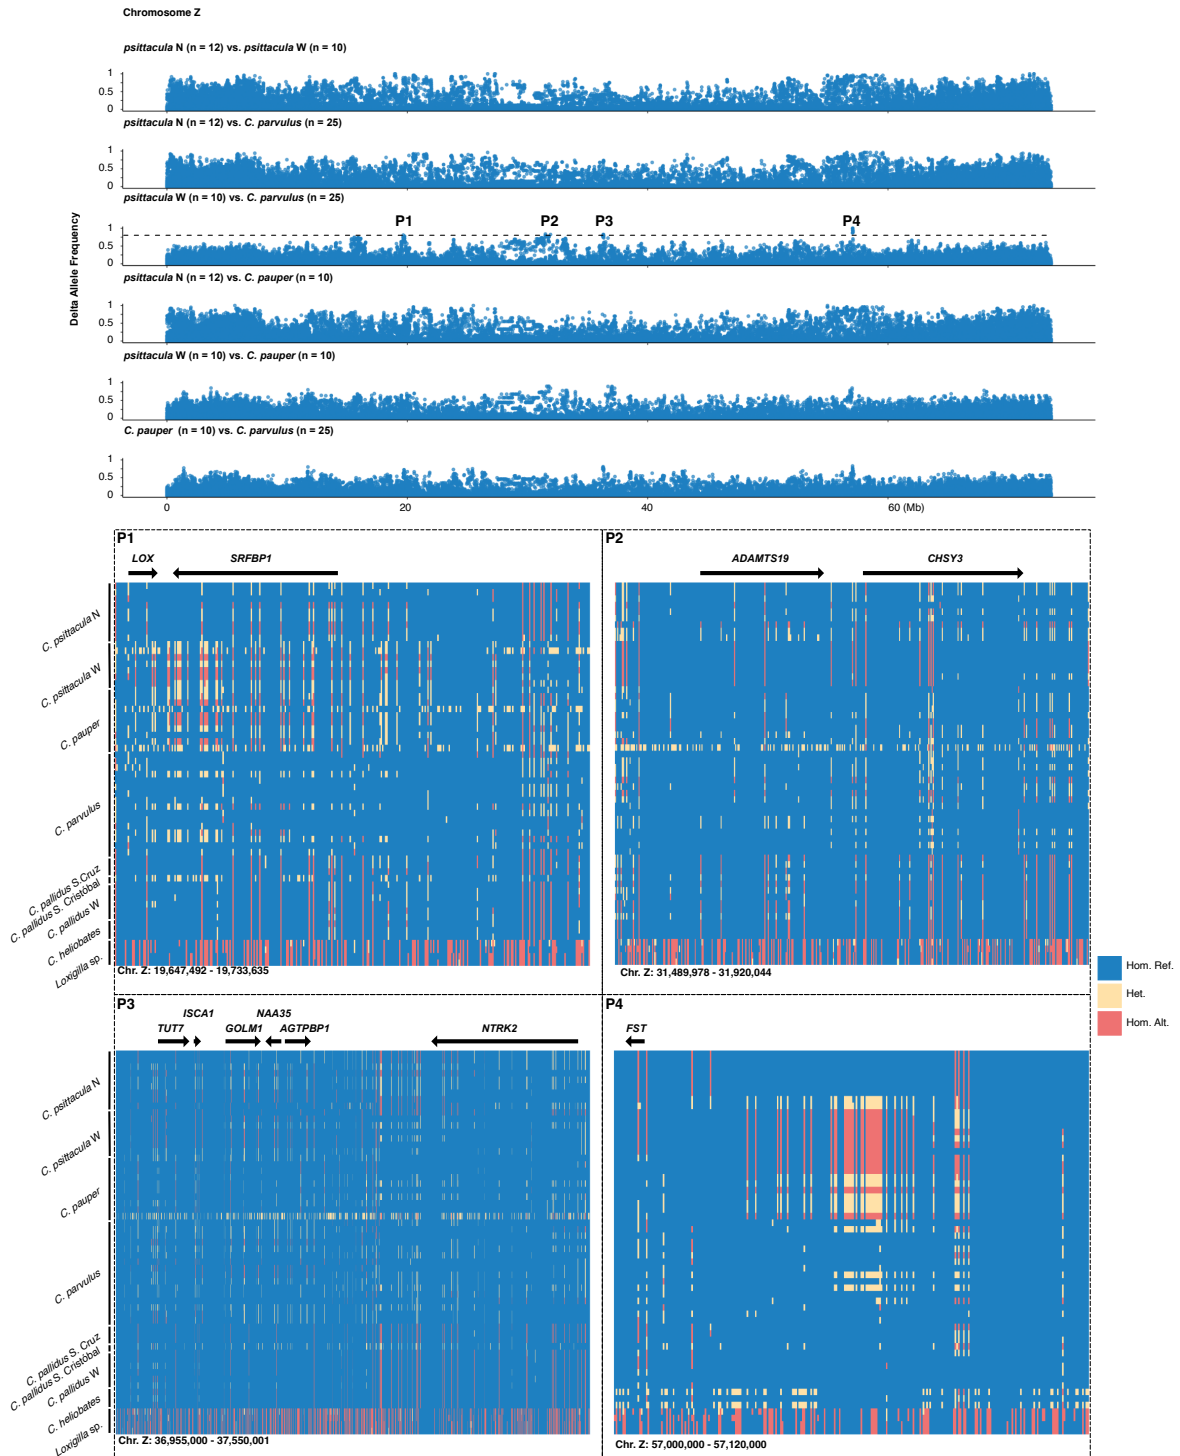

**Fig. S11: Chromosome Z divergence peaks.** Delta allele frequency among male *C. psittacula*, *C. pauper* and *C. parvulus* (upper panel) and close up of individual haplotypes (lower panel) within four loci selected based on delta allele frequency between western *psittacula* and *C. parvulus* > 0.8. The blue color in the lower panel indicates homozygosity to *C. parvulus*.

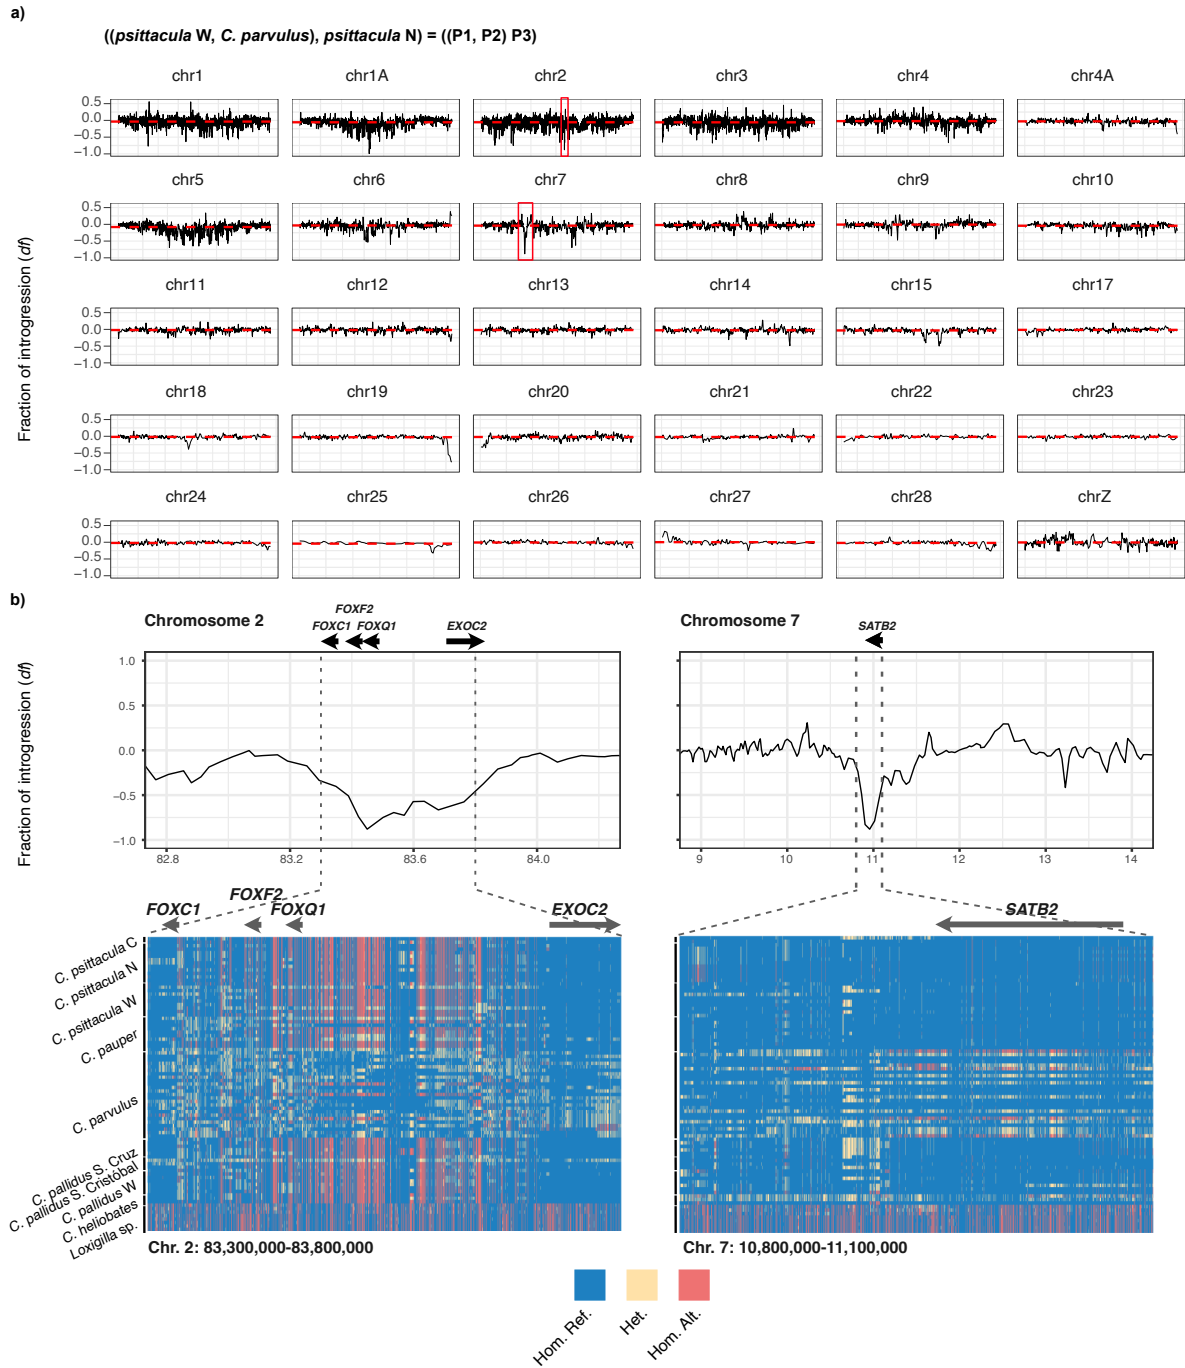

**Fig. S12: Genome-wide patterns of allele sharing between northern and western *psittacula*.** a) An inspection of patterns of shared alleles between northern and western *psittacula* across chromosomes reveals that, besides the *G03* locus on chromosome 1A, two additional loci have a distance fraction ( $df$ ) exceeding 75% (red boxes), one on chromosome 2 - a locus that was associated with genetic differentiation among *Geospiza* (Rubin and Enbody *et al.* 2022) - and one on chromosome 7. A close-up of the  $df$  across these loci, as well as their gene content and individual haplotypes are shown in b).

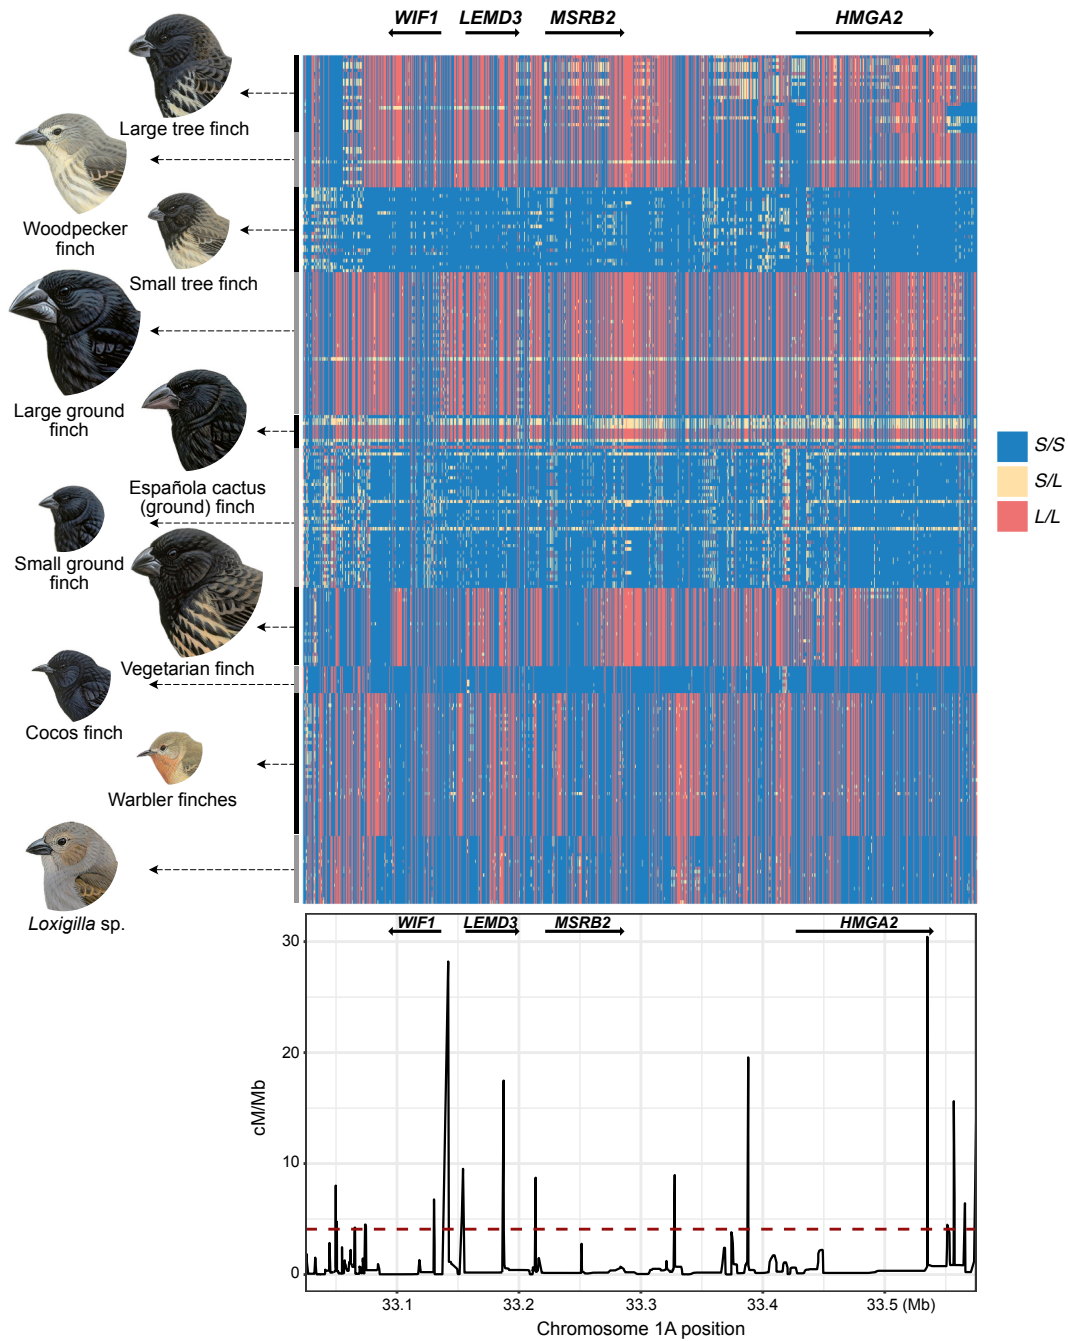

**Fig. S13:** Overview of *G03* haplotypes across the Darwin' finch radiation in the context of recombination rates (cM/Mb) across *G03* (Chr1A:33,05-33,55 Mb) estimated by Rubin *et al.* 2022. The blue colour indicates homozygosity to the *C. parvulus* allele (*S* - small), whereas red indicates homozygosity for the alternative (*L* - large) allele. The red dashed line indicates the average recombination rate across chromosome 1A. Bird illustrations courtesy of Cornell Lab of Ornithology, Brian Small from Birds of the World (birdsoftheworld.org).

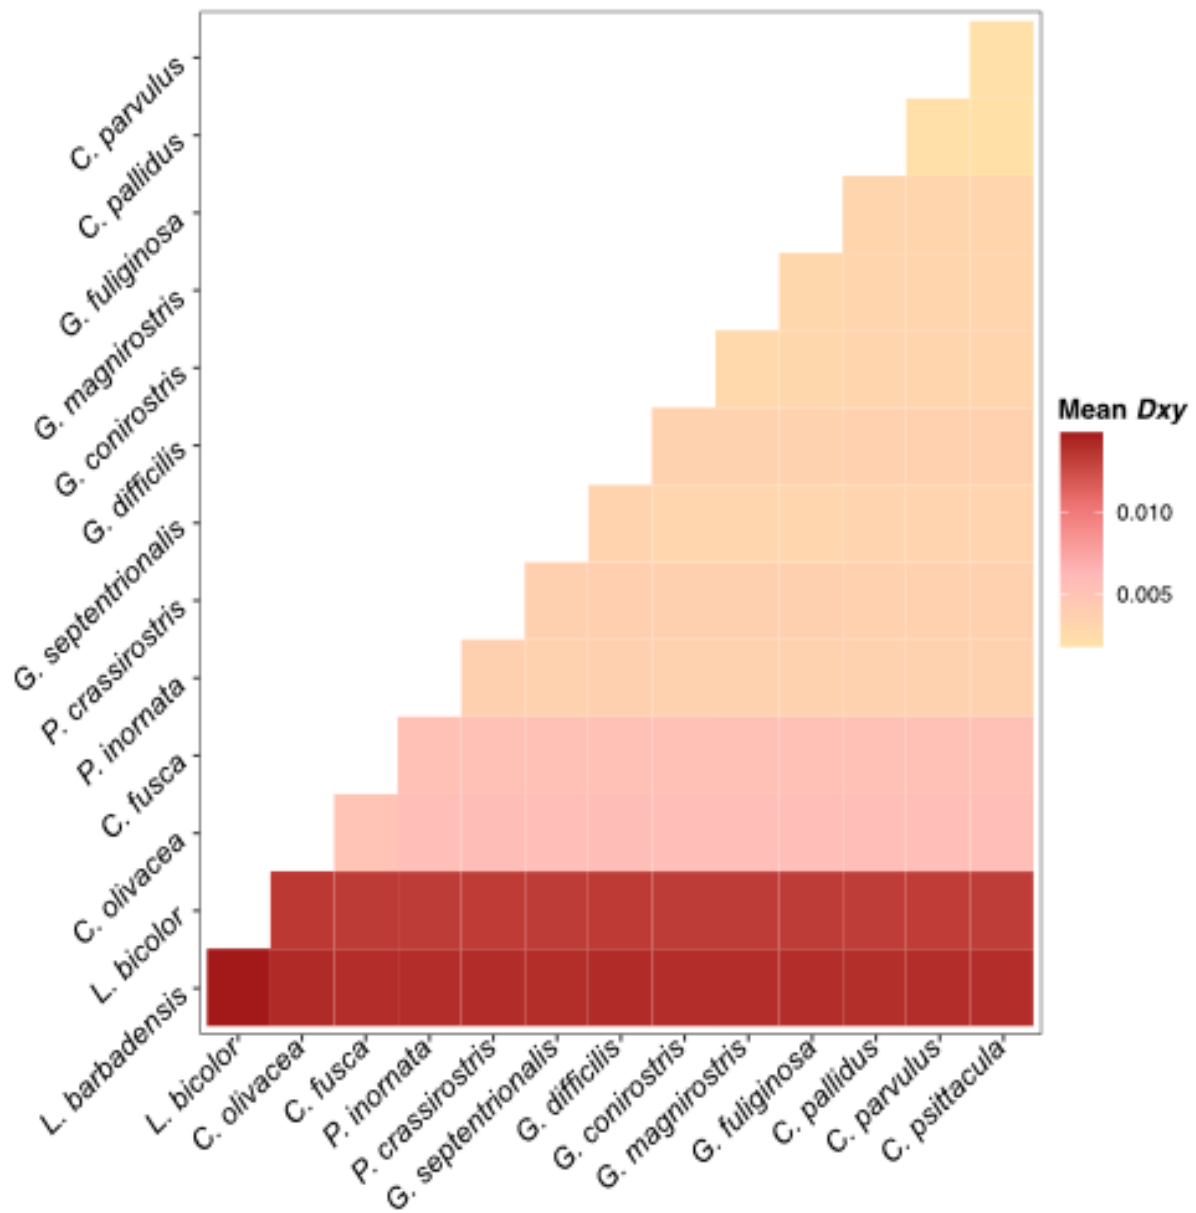

**Fig. S14: Patterns of absolute divergence across the Darwin's finch radiation.** Pairwise absolute divergence ( $d_{xy}$ ) genome-wide among selected species representing the major groups in the Darwin's finch radiation.

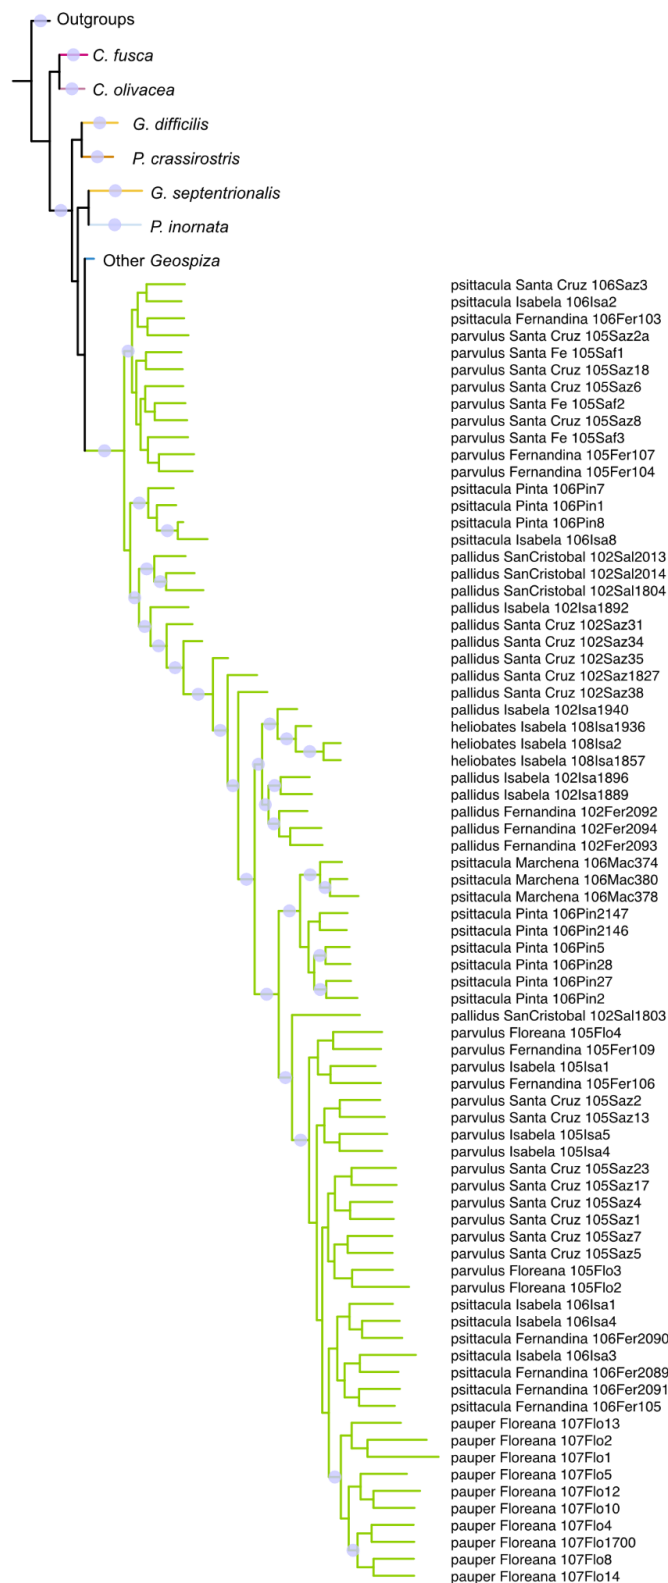

**Fig. S15: Chromosome Z phylogeny of Darwin's finches.** Maximum-likelihood phylogeny of the Darwin's finch radiation. Violet circles denote fully supported nodes.

## Tables

**Table S1:** Factor loadings of principal components on the 348 *Camarhynchus* individuals measured from museum specimens. The upper panel **A)** represents the output of a principal component analysis (PCA) on beak length of the upper mandible, combined depth of both upper and lower mandible and width of the upper mandible, whereas **B)** refers to a PCA on wing and tarsus length, two proxies for body size.

| <b>A)</b>             | <b>PC1</b> | <b>PC2</b> | <b>PC3</b> |
|-----------------------|------------|------------|------------|
| <b>St. dev.</b>       | 1.52       | 0.76       | 0.28       |
| <b>% Variance</b>     | 77.6       | 19.7       | 2.6        |
| <b>Length upper</b>   | 0.5        | -0.85      | -0.15      |
| <b>Depth combined</b> | 0.6        | 0.46       | -0.65      |
| <b>Width upper</b>    | 0.63       | 0.23       | 0.74       |
| <b>B)</b>             | <b>PC1</b> | <b>PC2</b> |            |
| <b>St. dev.</b>       | 1.35       | 0.4        |            |
| <b>% Variance</b>     | 92         | 8          |            |
| <b>Wing</b>           | -0.7       | -0.71      |            |
| <b>Tarsus</b>         | -0.7       | 0.7        |            |



**Table S2: Pairwise divergence time estimates.** Average divergence times in years (T) for each pairwise comparison among the nine *Camarhynchus* taxa: *C. pallidus* S. Cruz (*C. pal. pal*), *C. pallidus* S. Cristóbal (*C. pal. str.*), western *pallidus* (*C. pal. pro*), *C. heliobates* (*C. hel.*), *C. parvulus* (*C. par.*), *C. pauper* (*C. pau.*), *W psittacula* (*C. psi. aff.*), *central psittacula* (*C. psi. psi*) and northern *psittacula* (*C. psi. hab.*). We also report split times between the *Loxigilla* outgroups and Darwin's finches with large and small beaks based on the *G03* locus. Finally, we also report estimated divergence time among all the main groups of Darwin's finches. Divergence times were estimated based on the number of nucleotide substitutions while accounting for the intrapopulation nucleotide diversity ( $d\pi_x$  and  $d\pi_y$ ) as  $da = dxy - (dx + dy)/2$ , from which the divergence time was calculated as  $da/2\mu$ , with  $\mu = 2.04 \times 10^{-9}$  <sup>1,34,35</sup>.

| Pop. 1                                                                                         | Pop. 2                 | T (yrs)   | dxy%  | Region     |
|------------------------------------------------------------------------------------------------|------------------------|-----------|-------|------------|
| <b>Pairwise divergence time: pointed vs. blunt beak tree finches</b>                           |                        |           |       |            |
| <i>C. hel.</i>                                                                                 | <i>C. psi. hab.</i>    | 102 468   | 0.166 | autosomes  |
| <i>C. hel.</i>                                                                                 | <i>C. pau.</i>         | 89 538    | 0.176 | autosomes  |
| <i>C. hel.</i>                                                                                 | <i>C. par.</i>         | 86 307    | 0.184 | autosomes  |
| <i>C. hel.</i>                                                                                 | <i>C. psi. aff.</i>    | 85 018    | 0.166 | autosomes  |
| <i>C. pal. pro.</i>                                                                            | <i>C. psi. hab.</i>    | 67 435    | 0.160 | autosomes  |
| <i>C. pal. str.</i>                                                                            | <i>C. psi. hab.</i>    | 61 471    | 0.148 | autosomes  |
| <b>Pairwise divergence time: blunt beak tree finches</b>                                       |                        |           |       |            |
| <i>C. psi. hab.</i>                                                                            | <i>C. pau.</i>         | 57 637    | 0.173 | autosomes  |
| <i>C. psi. hab.</i>                                                                            | <i>C. par.</i>         | 47 979    | 0.179 | autosomes  |
| <i>C. psi. hab.</i>                                                                            | <i>C. psi. aff.</i>    | 44 394    | 0.160 | autosomes  |
| <i>C. pau.</i>                                                                                 | <i>C. psi. aff.</i>    | 21 396    | 0.165 | autosomes  |
| <i>C. pau.</i>                                                                                 | <i>C. par.</i>         | 19 134    | 0.182 | autosomes  |
| <i>C. psi. aff.</i>                                                                            | <i>C. par.</i>         | 8 050     | 0.170 | autosomes  |
| <b>Pairwise divergence time: pointed beak tree finches</b>                                     |                        |           |       |            |
| <i>C. pal. str.</i>                                                                            | <i>C. hel.</i>         | 80 612    | 0.146 | autosomes  |
| <i>C. pal. str.</i>                                                                            | <i>C. pal. pro.</i>    | 52 399    | 0.140 | autosomes  |
| <i>C. pal. pal.</i>                                                                            | <i>C. hel.</i>         | 47 337    | 0.119 | autosomes  |
| <i>C. pal. str.</i>                                                                            | <i>C. pal. pal.</i>    | 52 255    | 0.113 | autosomes  |
| <i>C. pal. pro.</i>                                                                            | <i>C. hel.</i>         | 34 435    | 0.134 | autosomes  |
| <i>C. pal. pal.</i>                                                                            | <i>C. pal. pro.</i>    | 13 508    | 0.111 | autosomes  |
| <b>Pairwise divergence time between the outgroups and selected species based on <i>G03</i></b> |                        |           |       |            |
| <i>C. psittacula</i>                                                                           | <i>C. parvulus</i>     | 1 116 694 | 0.570 | <i>G03</i> |
| <i>G. fuliginosa</i>                                                                           | <i>G. magnirostris</i> | 954 223   | 0.495 | <i>G03</i> |
| <i>L. barbadensis</i>                                                                          | <i>C. parvulus</i>     | 2 075 612 | 0.974 | <i>G03</i> |
| <i>L. barbadensis</i>                                                                          | <i>G. fuliginosa</i>   | 1 838 051 | 0.879 | <i>G03</i> |
| <i>L. barbadensis</i>                                                                          | <i>G. magnirostris</i> | 1 842 136 | 0.789 | <i>G03</i> |
| <i>L. barbadensis</i>                                                                          | <i>C. psittacula</i>   | 1 925 049 | 0.846 | <i>G03</i> |
| <i>L. noctis</i>                                                                               | <i>G. fuliginosa</i>   | 1 119 121 | 0.645 | <i>G03</i> |
| <i>L. noctis</i>                                                                               | <i>C. parvulus</i>     | 1 309 992 | 0.663 | <i>G03</i> |
| <i>L. noctis</i>                                                                               | <i>G. magnirostris</i> | 1 154 659 | 0.626 | <i>G03</i> |

|                                                                            |                      |           |       |            |
|----------------------------------------------------------------------------|----------------------|-----------|-------|------------|
| <i>L. noctis</i>                                                           | <i>C. psittacula</i> | 1 231 361 | 0.582 | <i>G03</i> |
| <b>Phylogenetic split time between the main groups of Darwin's finches</b> |                      |           |       |            |
| <i>L. barbadensis</i>                                                      | <i>C. parvulus</i>   | 2 932 103 | 1.396 | autosomes  |
| <i>L. noctis</i>                                                           | <i>C. parvulus</i>   | 2 483 096 | 1.328 | autosomes  |
| <i>C. fusca</i>                                                            | <i>C. parvulus</i>   | 849 753   | 0.535 | autosomes  |
| <i>C. olivacea</i>                                                         | <i>C. parvulus</i>   | 838 922   | 0.565 | autosomes  |
| <i>P. inornata</i>                                                         | <i>C. parvulus</i>   | 501 540   | 0.343 | autosomes  |
| <i>P. crassirostris</i>                                                    | <i>C. parvulus</i>   | 483 417   | 0.360 | autosomes  |
| <i>G. septentrionalis</i>                                                  | <i>C. parvulus</i>   | 357 694   | 0.317 | autosomes  |
| <i>G. difficilis</i>                                                       | <i>C. parvulus</i>   | 380 174   | 0.352 | autosomes  |
| <i>G. conirostris</i>                                                      | <i>C. parvulus</i>   | 287 807   | 0.313 | autosomes  |
| <i>G. conirostris</i>                                                      | <i>C. pallidus</i>   | 361 842   | 0.314 | autosomes  |
| <i>G. conirostris</i>                                                      | <i>C. heliobates</i> | 334 389   | 0.310 | autosomes  |

**Table S3: Gene content at *Fst* divergence peaks.** The table summarises information about the gene content present within the *Fst* divergence peaks resulting from the pairwise contrasts of blunt beak tree finches (marked with a red star in Fig. S8). The table contains information on the chromosome location, the range of positions spanned (in Mb), the peak ID, the size of the locus (in kb), gene name and its start and end positions.

| Chr. | Peak range (Mb) | Peak ID | Locus size (kb) | Gene                      | Gene start | Gene end   |
|------|-----------------|---------|-----------------|---------------------------|------------|------------|
| 1A   | 33,05-33,55     | p1      | 500             | <i>WIF1</i>               | 33,089,099 | 33,127,862 |
| 1A   | 33,05-33,55     | p1      | 500             | <i>LEMD3</i>              | 33,145,932 | 33,186,441 |
| 1A   | 33,05-33,55     | p1      | 500             | <i>MSRB3</i>              | 33,209,829 | 33,269,045 |
| 1A   | 33,05-33,55     | p1      | 500             | <i>HMGA2</i>              | 33,408,202 | 33,520,236 |
| 5    | 24,30-24,90     | p1      | 600             | <i>DLL4</i>               | 24,374,593 | 24,385,306 |
| 5    | 24,30-24,90     | p1      | 600             | <i>ENSCPVG00005007291</i> | 24,413,002 | 24,414,268 |
| 5    | 24,30-24,90     | p1      | 600             | <i>INO80</i>              | 24,427,712 | 24,483,887 |
| 5    | 24,30-24,90     | p1      | 600             | <i>CHP1</i>               | 24,509,194 | 24,528,693 |
| 5    | 24,30-24,90     | p1      | 600             | <i>OIP5</i>               | 24,548,593 | 24,552,174 |
| 5    | 24,30-24,90     | p1      | 600             | <i>ENSCPVG00005007452</i> | 24,552,432 | 24,563,664 |
| 5    | 24,30-24,90     | p1      | 600             | <i>NDUFAF1</i>            | 24,566,873 | 24,573,984 |
| 5    | 24,30-24,90     | p1      | 600             | <i>RFT1</i>               | 24,574,017 | 24,599,748 |
| 5    | 24,30-24,90     | p1      | 600             | <i>C14orf28</i>           | 24,647,625 | 24,649,044 |
| 5    | 24,30-24,90     | p1      | 600             | <i>ITPKA</i>              | 24,664,869 | 24,702,744 |
| 5    | 24,30-24,90     | p1      | 600             | <i>ENSCPVG00005007663</i> | 24,709,136 | 24,725,392 |
| 5    | 24,30-24,90     | p1      | 600             | <i>Itk</i>                | 24,725,768 | 24,798,265 |
| 5    | 24,30-24,90     | p1      | 600             | <i>RPAP1</i>              | 24,858,057 | 24,892,151 |
| 6    | 16,90-16,98     | p1      | 80              | <i>SCD</i>                | 16,851,848 | 16,873,278 |
| 6    | 16,90-16,98     | p1      | 80              | <i>PKD2L1</i>             | 16,888,038 | 16,904,321 |
| 6    | 16,90-16,98     | p1      | 80              | <i>ABCG2</i>              | 16,915,998 | 16,932,751 |
| 6    | 16,90-16,98     | p1      | 80              | <i>BLOC1S2</i>            | 16,933,348 | 16,936,992 |
| 6    | 16,90-16,98     | p1      | 80              | <i>CYP2C23</i>            | 16,940,270 | 16,947,152 |

|   |             |    |     |                           |            |            |
|---|-------------|----|-----|---------------------------|------------|------------|
| 6 | 16,90-16,98 | p1 | 80  | <i>ALOX5</i>              | 16,963,749 | 16,988,430 |
| Z | 19,64-19,84 | p1 | 200 | <i>LOX</i>                | 19,647,492 | 19,658,168 |
| Z | 19,64-19,84 | p1 | 200 | <i>SRFBP1</i>             | 19,665,144 | 19,733,635 |
| Z | 31,48-31,92 | p2 | 440 | <i>ADAMTS19</i>           | 31,572,051 | 31,702,311 |
| Z | 31,48-31,92 | p2 | 440 | <i>ENSCPVG00005016319</i> | 31,716,619 | 31,717,897 |
| Z | 31,48-31,92 | p2 | 440 | <i>CHSY3</i>              | 31,740,791 | 31,878,337 |
| Z | 36,95-37,55 | p3 | 600 | <i>TUT7</i>               | 36,989,261 | 37,022,159 |
| Z | 36,95-37,55 | p3 | 600 | <i>ISCA1</i>              | 37,026,264 | 37,031,100 |
| Z | 36,95-37,55 | p3 | 600 | <i>GOLM1</i>              | 37,052,974 | 37,086,527 |
| Z | 36,95-37,55 | p3 | 600 | <i>NAA35</i>              | 37,090,404 | 37,115,215 |
| Z | 36,95-37,55 | p3 | 600 | <i>AGTPBP1</i>            | 37,125,196 | 37,172,188 |
| Z | 36,95-37,55 | p3 | 600 | <i>NTRK2</i>              | 37,341,598 | 37,533,499 |
| Z | 57,01-57,12 | p4 | 120 | <i>FST</i>                | 57,006,411 | 57,012,811 |

---

## References

1. Rubin, C.-J. *et al.* Rapid adaptive radiation of Darwin's finches depends on ancestral genetic modules. *Sci. Adv.* **8**, eabm5982 (2022).
2. Enbody, E. D. *et al.* Community-wide genome sequencing reveals 30 years of Darwin's finch evolution. *Science* **381**, eadf6218 (2023).
3. Lamichhaney, S. *et al.* A beak size locus in Darwin's finches facilitated character displacement during a drought. *Science* **352**, 470–474 (2016).
4. Pfannkuche, K., Summer, H., Li, O., Hescheler, J. & Dröge, P. The high mobility group protein HMGA2: a co-regulator of chromatin structure and pluripotency in stem cells? *Stem Cell Rev.* **5**, 224–230 (2009).
5. Zhou, X., Benson, K. F., Ashar, H. R. & Chada, K. Mutation responsible for the mouse pygmy phenotype in the developmentally regulated factor HMGI-C. *Nature* **376**, 771–774 (1995).
6. Weedon, M. N. *et al.* A common variant of HMGA2 is associated with adult and childhood height in the general population. *Nat. Genet.* **39**, 1245–1250 (2007).
7. Yang, T.-L. *et al.* HMGA2 is confirmed to be associated with human adult height: Replication between HMGA2 and height. *Ann. Hum. Genet.* **74**, 11–16 (2010).
8. Pandey, S. M. Chromatin remodeling complexes: The regulators of genome function. *Global Journal of Zoology* **1**, 007–013 (2016).
9. Guo, D.-C. *et al.* Loss-of-function mutations in YY1AP1 lead to Grange syndrome and a fibromuscular dysplasia-like vascular disease. *Am. J. Hum. Genet.* **100**, 21–30 (2017).
10. Shukla, S. *et al.* Conformational switching of Arp5 subunit regulates INO80 chromatin remodeling. *Nucleic Acids Res.* **53**, gkae1187 (2025).
11. Watanabe, K. P. *et al.* Avian cytochrome P450 (CYP) 1-3 family genes: isoforms, evolutionary relationships, and mRNA expression in chicken liver. *PLoS One* **8**, e75689 (2013).
12. Zhao, M. M. *et al.* Fatty acids modulate the expression of pyruvate kinase and arachidonate-lipoxygenase through PPAR $\gamma$ /CYP2C45 pathway: a link to goose fatty liver. *Poult. Sci.* **98**, 4346–4358 (2019).

13. Yang, S., Wang, W. & Ni, S. *G0S2* inhibits adipogenesis and unsaturated fatty acid biosynthesis by repressing the expression of *SCD* in chicken. *Int. J. Food Sci. Technol.* **58**, 2518–2526 (2023).
14. Chen, L. *et al.* Two cis-regulatory SNPs upstream of *ABCG2* synergistically cause the blue eggshell phenotype in the duck. *PLoS Genet.* **16**, e1009119 (2020).
15. Liu, H. *et al.* Genome-wide association and selective sweep analyses reveal genetic loci for FCR of egg production traits in ducks. *Genet. Sel. Evol.* **53**, 98 (2021).
16. Lack, D. *Darwin's Finches*. (Cambridge University Press, 1947).
17. Laczkó, R. & Csiszár, K. Lysyl oxidase (LOX): Functional contributions to signaling pathways. *Biomolecules* **10**, (2020).
18. Zhang, X., Azhar, G. & Wei, J. Y. Sirtuin-2 is regulated by serum response factor and p49/strap genes. *Innov. Aging* **1**, 898–898 (2017).
19. Brocker, C. N., Vasiliou, V. & Nebert, D. W. Evolutionary divergence and functions of the ADAM and ADAMTS gene families. *Hum. Genomics* **4**, 43–55 (2009).
20. Ishimaru, D., Sugiura, N., Akiyama, H., Watanabe, H. & Matsumoto, K. Alterations in the chondroitin sulfate chain in human osteoarthritic cartilage of the knee. *Osteoarthritis Cartilage* **22**, 250–258 (2014).
21. Wilson, D. G. *et al.* Chondroitin sulfate synthase 1 (*Chsy1*) is required for bone development and digit patterning. *Dev. Biol.* **363**, 413–425 (2012).
22. Lim, J. *et al.* Uridylation by TUT4 and TUT7 marks mRNA for degradation. *Cell* **159**, 1365–1376 (2014).
23. Gu, S., Huang, Q., Sun, C., Wen, C. & Yang, N. Transcriptomic and epigenomic insights into pectoral muscle fiber formation at the late embryonic development in pure chicken lines. *Poult. Sci.* **103**, 103882 (2024).
24. Jia, Y. *et al.* NTRK2 promotes sheep granulosa cells proliferation and reproductive hormone secretion and activates the PI3K/AKT pathway. *Animals (Basel)* **14**, 1465 (2024).
25. Perini, F., Cendron, F., Lasagna, E., Cassandro, M. & Penasa, M. Genomic insights into shank and eggshell color in Italian local chickens. *Poult. Sci.* **103**, 103677 (2024).
26. Dushyanth, K., Shukla, R., Chatterjee, R. N. & Bhattacharya, T. K. Expression and

- polymorphism of Follistatin (FST) gene and its association with growth traits in native and exotic chicken. *Anim. Biotechnol.* **33**, 824–834 (2022).
27. Wasti, S. *et al.* Expression of follistatin is associated with egg formation in the oviduct of laying hens. *Anim. Sci. J.* **91**, e13396 (2020).
  28. Lehtonen, P. K. *et al.* Candidate genes for colour and vision exhibit signals of selection across the pied flycatcher (*Ficedula hypoleuca*) breeding range. *Heredity (Edinb.)* **108**, 431–440 (2011).
  29. Toomey, M. B. *et al.* A non-coding region near Follistatin controls head colour polymorphism in the Gouldian finch. *Proc. Biol. Sci.* **285**, 20181788 (2018).
  30. Lawson, L. P. *et al.* A hidden finch from the Galapagos Islands: a genetically and morphologically distinctive woodpecker finch from San Cristobal Island. *Zool. J. Linn. Soc.* **202**, zlae163 (2024).
  31. Sclater, P. L., Salvin, O. & Habel, D. Characters of new species of birds collected by Dr. Habel in the Galápagos Islands. in (Zoological Society, 1870).
  32. Bowman, R. I. Morphological differentiation and adaptation in the Galapagos finches. *Univ. Calif. Publ. Zool.* **58**, 1–302 (1961).
  33. Singhal, S., Leaché, A. D., Fujita, M. K., Cadena, C. D. & Zapata, F. A genomic perspective on species delimitation. *Annu. Rev. Ecol. Evol. Syst.* (2025) doi:10.1146/annurev-ecolsys-102723-055311.
  34. Nei, M. *Molecular Evolutionary Genetics*. (Columbia University Press, New York Chichester, West Sussex, 1987). doi:10.7312/nei-92038-016.
  35. Lamichhaney, S. *et al.* Evolution of Darwin’s finches and their beaks revealed by genome sequencing. *Nature* **518**, 371–375 (2015).
